# Supplementary material for: In Silico Genome-Wide Analysis Reveals the Potential Links Between Core Genome of Acidithiobacillus thiooxidans and Its Autotrophic Lifestyle
Source: PubMed Central journal article supplement (PMC6002666; doi:10.3389/fmicb.2018.01255), 2018-06-08
Supplement: Data_Sheet_1.pdf [file Data_Sheet_1.pdf]

Supplemental Material for

***In silico* genome-wide analysis reveals the potential links between core genome of *Acidithiobacillus thiooxidans* and its autotrophic lifestyle**

Xian Zhang,<sup>1</sup> Zhenghua Liu,<sup>2</sup> Guanyun Wei,<sup>3</sup> Fei Yang,<sup>1\*</sup> Xueduan Liu,<sup>2,4\*</sup>

\*Corresponding author: Fei Yang and Xueduan Liu

<sup>1</sup>*Department of Occupational and Environmental Health, Xiangya School of Public Health, Central South University, Changsha, China;*

<sup>2</sup>*School of Minerals Processing and Bioengineering, Central South University, Changsha, China;*

<sup>3</sup>*College of Life Science, Nanjing Normal University, Nanjing, China*

<sup>4</sup>*Key Laboratory of Biometallurgy of Ministry of Education, Central South University, Changsha, China*

## SUPPLEMENTARY FIGURES

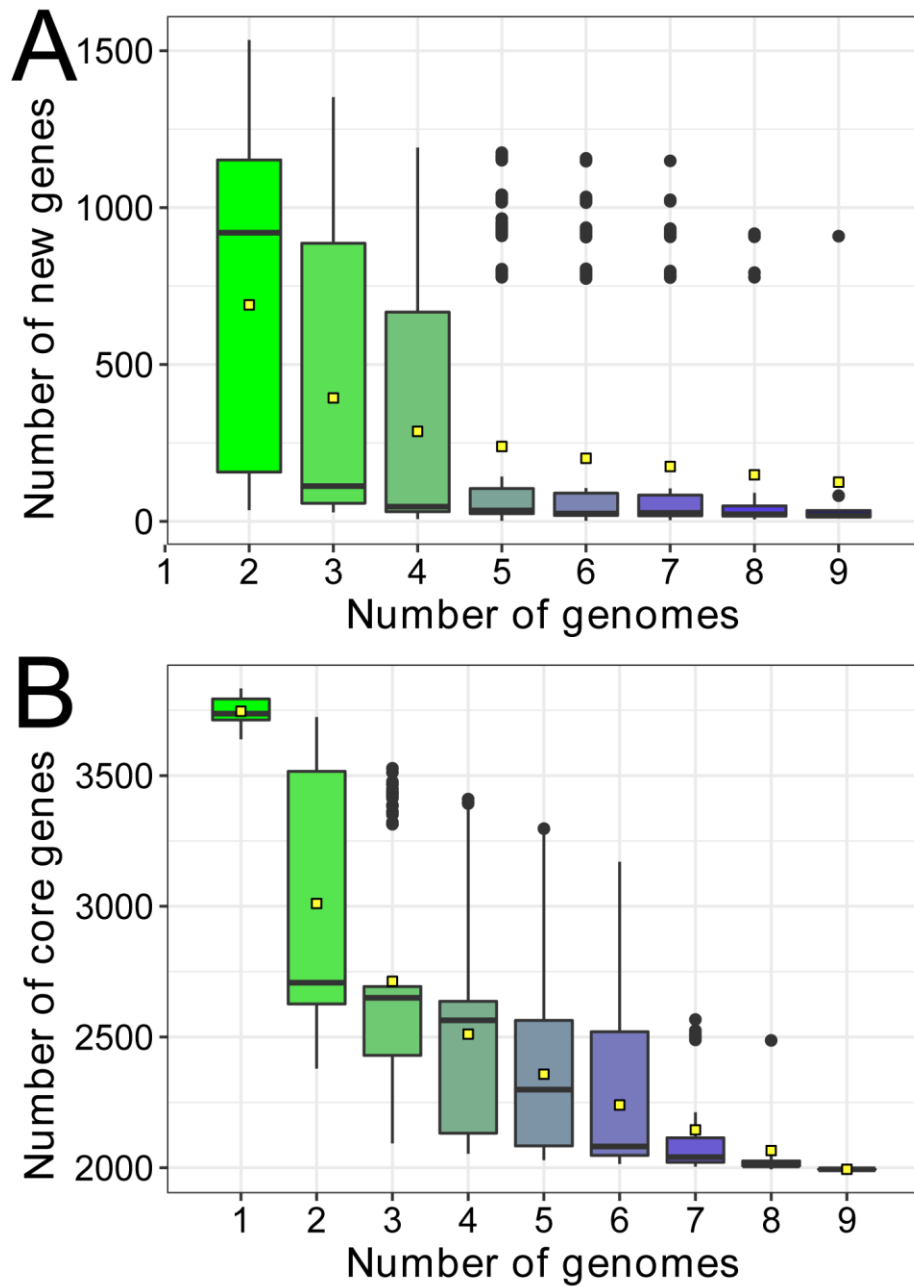

**FIGURE S1** Distributions of new genes and core genes' values: averages vs. medians. Dark spots represent the distributions of new genes and core genes' values. For each  $N$  (the number of sequenced genomes), the box-plots indicating the medians (black lines) and the average (yellow rectangle) were shown.

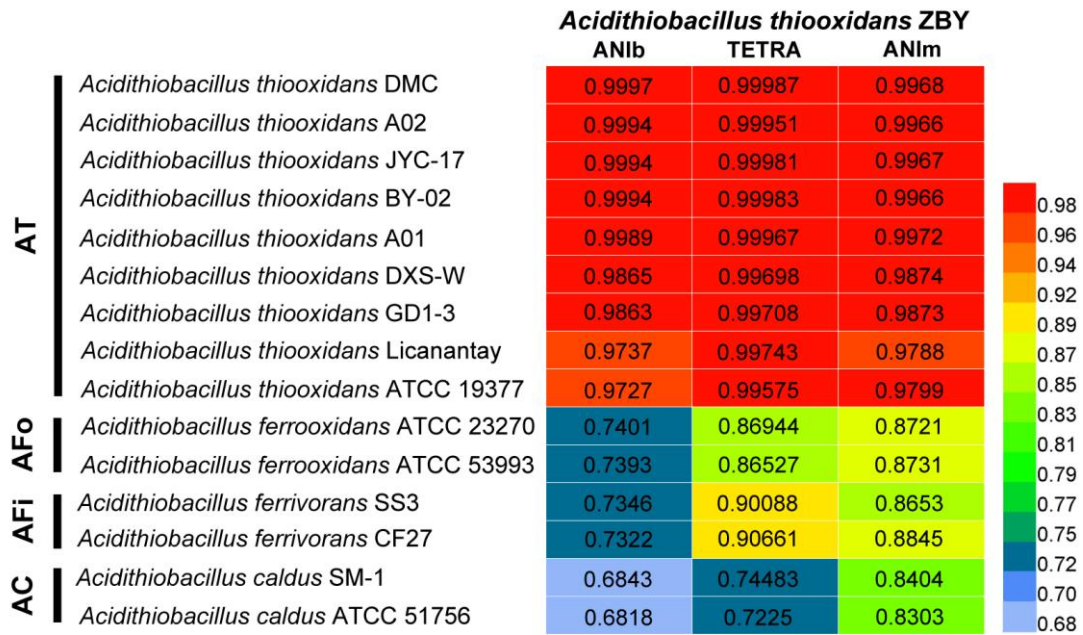

**FIGURE S2** Genome-based phylogenetic indicators of *Acidithiobacillus* spp. The average nucleotide identity (ANI) based on BLAST (ANiB) and MUMmer (ANIm), as well as tetranucleotide frequency correlation coefficient (TETRA) were calculated using the software JSpecies v1.2.1 with default parameters. Values above the thresholds of  $\geq 95\%$  (ANI) and  $\geq 0.99$  (TETRA) indicate that strains belong to the same species. Abbreviation: AT, *Acidithiobacillus thiooxidans*; AFo: *Acidithiobacillus ferrooxidans*; AFi: *Acidithiobacillus ferrivorans*; AC: *Acidithiobacillus caldus*.

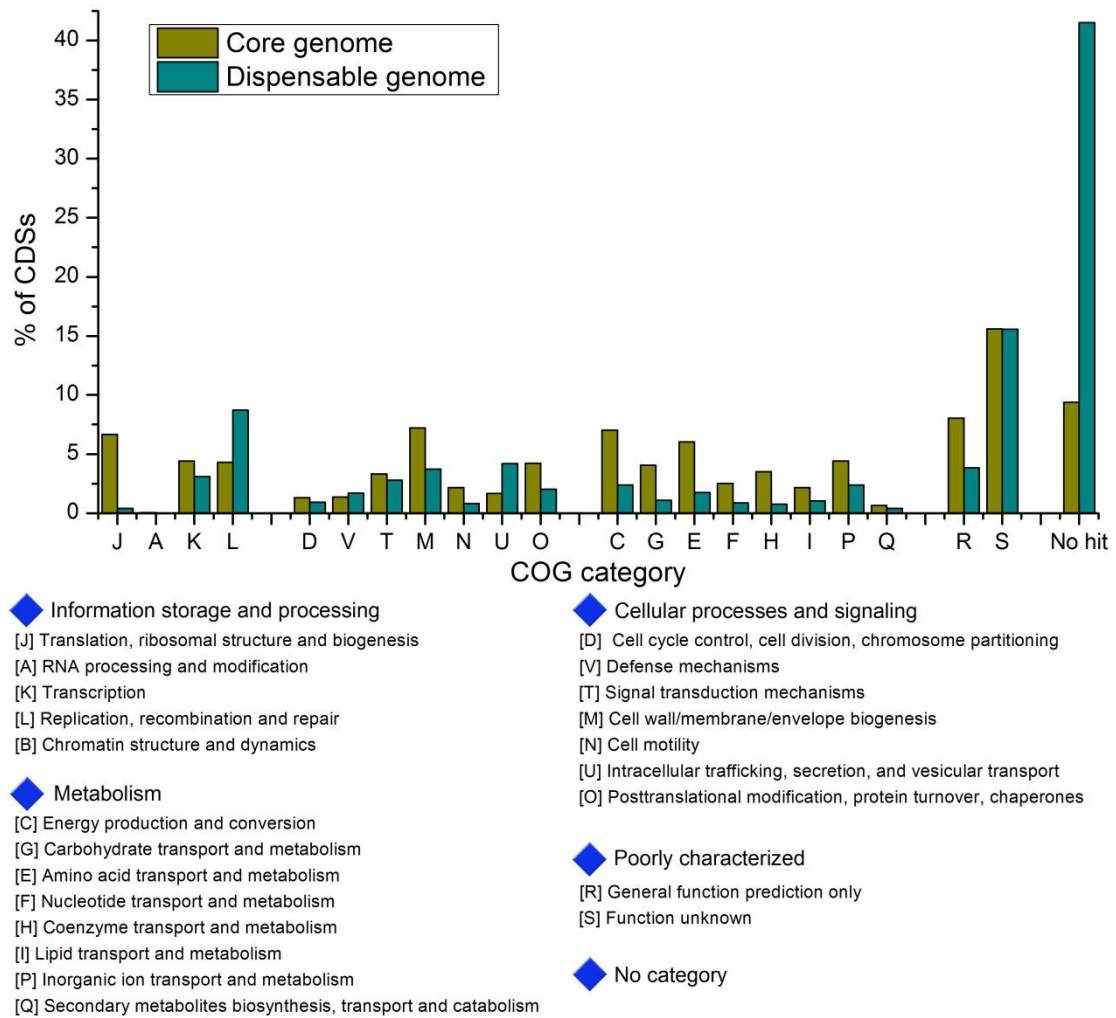

**FIGURE S3** Functional assignments of core and dispensable genome via alignment against the extended COG database.

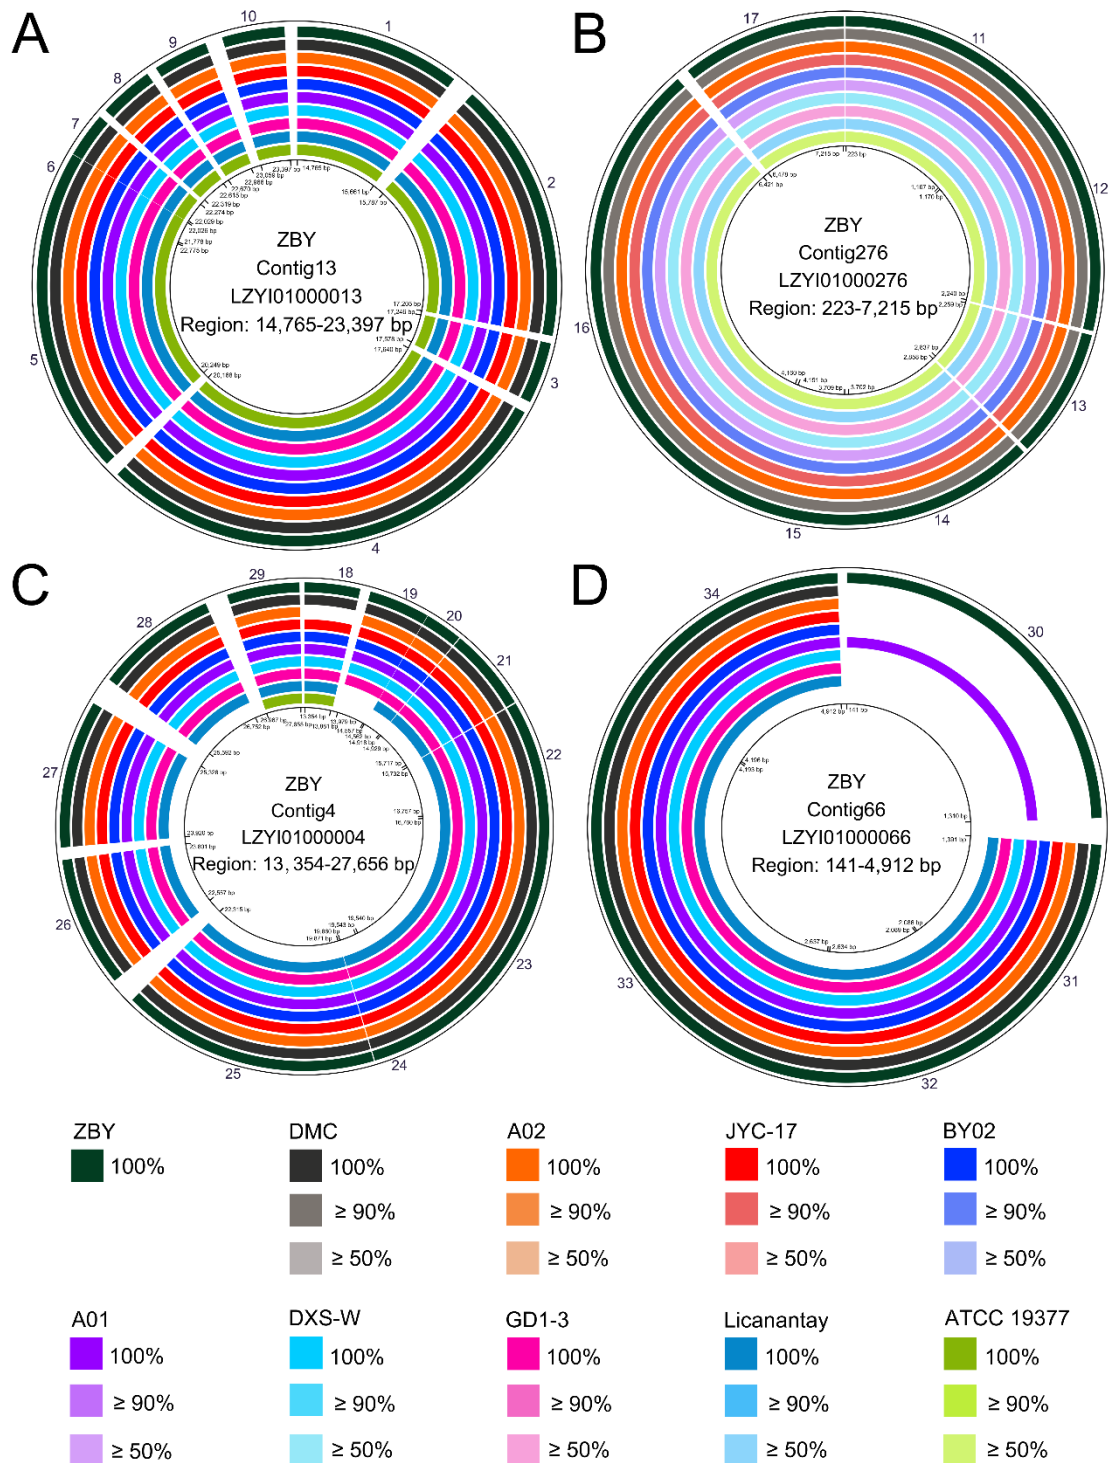

**FIGURE S4** Partial genomic map of *A. thiooxidans* strains containing carboxysome-associated gene cluster (A), *coxLMS* (B), *nirBD/nasA* (C), and *narGHJI* (D). Genomic regions of *A. thiooxidans* ZBY were used as the reference. Matches to the reference genome were displayed color-coded on the rings two to ten. Color intensity indicates the level of sequence identities between query genome and reference genome (e.g. higher color intensity means the higher sequence identity). Proteins in different genomic regions of interest were numbered with 1 to 34. Abbreviation: 1, RuBisCO operon transcriptional regulator; 2, ribulose-bisphosphate carboxylase large subunit;

3, ribulose biphosphate carboxylase small subunit; 4, carboxysome shell protein CsoS2; 5, carboxysome shell carbonic anhydrase; 6, carboxysome peptide A; 7, carboxysome peptide B; 8-10, carbon dioxide-concentrating protein CcmK; 11, xanthine dehydrogenase accessory factor; 12, amidohydrolase; 13, ureidoglycolate hydrolase; 14, carbon-monoxide dehydrogenase medium subunit/xanthine dehydrogenase FAD-binding subunit; 15, carbon-monoxide dehydrogenase small subunit/xanthine dehydrogenase, iron-sulfur binding subunit; 16, carbon monoxide dehydrogenase, large subunit/xanthine dehydrogenase, molybdenum-binding subunit; 17, phosphorylase; 18, hypothetical protein; 19, response regulator NasT; 20, cobalamin biosynthesis protein CbiX; 21, uroporphyrin-III methyltransferase; 22, glycosyl transferase, family 3; 23, assimilatory nitrate reductase (NADH) catalytic subunit NasA; 24, assimilatory nitrite reductase [NAD(P)H] small subunit NirD; 25, assimilatory nitrite reductase [NAD(P)H] large subunit NirB; 26, hypothetical protein; 27, major facilitator superfamily MFS\_1, nitrate/nitrite transporter; 28, nitrate transporter; 29, transcriptional regulator, Crp/Fnr family; 30, MFS transporter; 31, respiratory nitrate reductase, gamma subunit NarI; 32, respiratory nitrate reductase delta subunit NarJ; 33, respiratory nitrate reductase beta subunit NarH; 34, respiratory nitrate reductase alpha subunit NarG.

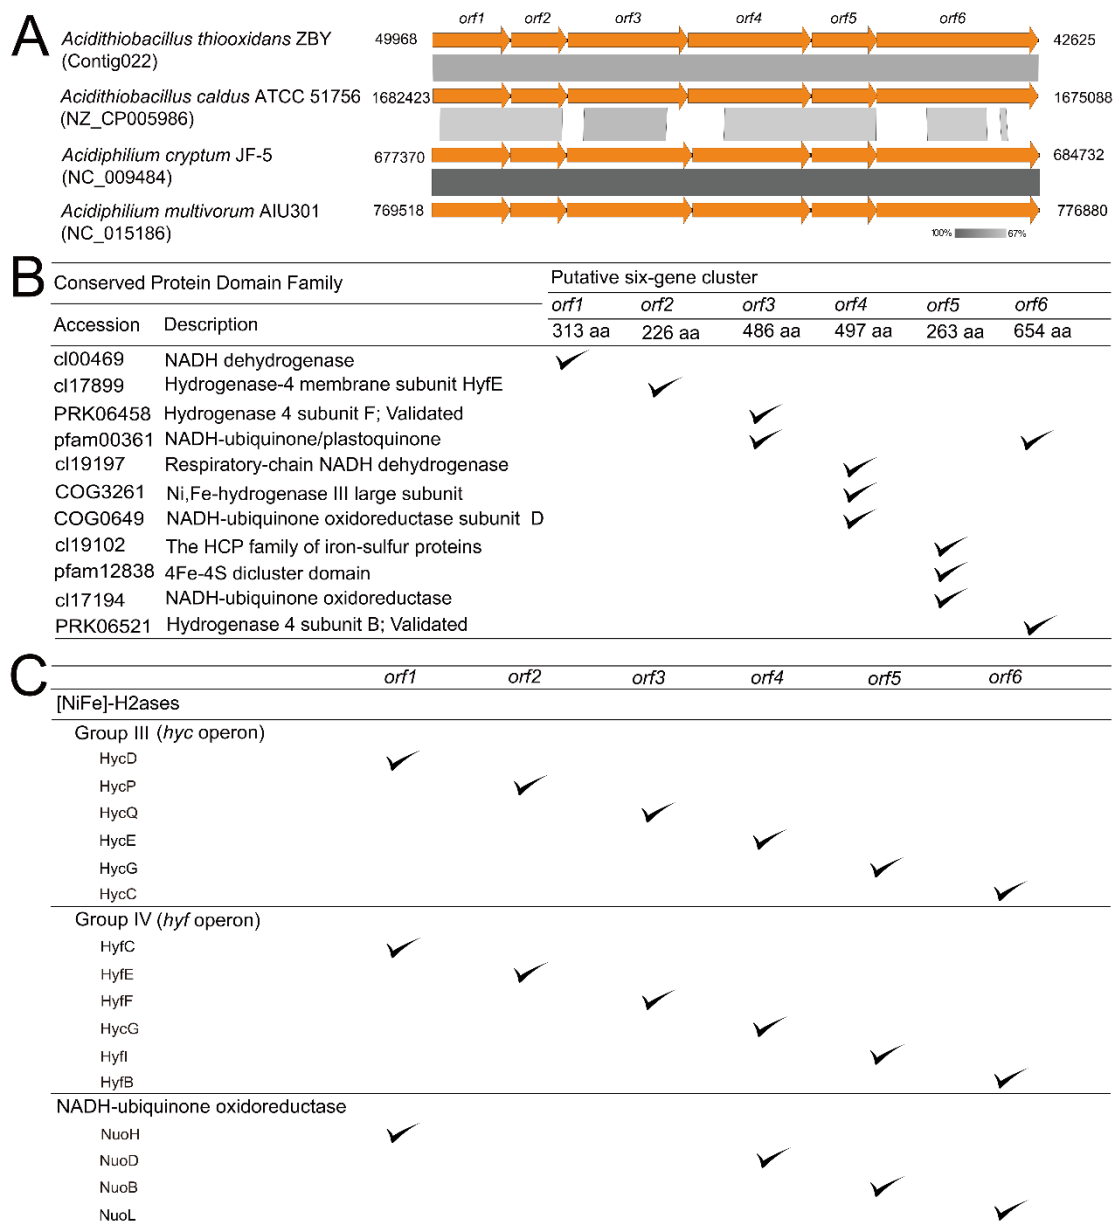

**FIGURE S5** Functional assignments of putative six-gene clusters in *A. thiooxidans* strains. (A) Comparison of *A. thiooxidans* ZBY and other microorganisms containing identified or putative gene cluster; (B) Identification of conserved domains of complex enzyme encoded by six-gene cluster; (C) Comparison of amino acid sequences involved in these candidate genes to the identified [NiFe]-hydrogenases and NADH-ubiquinone oxidoreductase.

## SUPPLEMENTARY TABLES

**TABLE S1** List of the genomes of novel strain ZBY and other recognized *Acidithiobacillus* (*A.*) spp. used for the construction of genome-based phylogeny and the calculation of average nucleotide identity.

| Organism               | Accession Number | Genome size (Mb) | GC %  | Reference                 |
|------------------------|------------------|------------------|-------|---------------------------|
| Strain ZBY             | LZYI000000000    | 3.79             | 53.17 | This study                |
| <i>A. thiooxidans</i>  |                  |                  |       |                           |
| ATCC 19377             | AFOH000000000    | 3.02             | 53.20 | (Valdes et al., 2011)     |
| A01                    | AZMO000000000    | 3.82             | 53.10 | (Yin et al., 2014)        |
| Licanantay             | JMEB000000000    | 3.94             | 52.80 | (Travisany et al., 2014)  |
| GD1-3                  | LWSC000000000    | 3.95             | 52.92 | (Zhang et al., 2016a)     |
| DXS-W                  | LWRY000000000    | 3.95             | 52.92 | (Zhang et al., 2016a)     |
| A02                    | LWSA000000000    | 3.72             | 53.01 | (Zhang et al., 2016a)     |
| BY-02                  | LWRZ000000000    | 3.81             | 53.07 | (Zhang et al., 2016a)     |
| DMC                    | LWSB000000000    | 3.85             | 53.06 | (Zhang et al., 2016a)     |
| TYC-17                 | LWSD000000000    | 3.83             | 53.06 | (Zhang et al., 2016a)     |
| <i>A. ferrooxidans</i> |                  |                  |       |                           |
| ATCC 23270             | NC_011761        | 2.98             | 58.80 | (Valdés et al., 2008)     |
| ATCC 53993             | NC_011206        | 2.89             | 58.90 | Unpublished               |
| <i>A. caldus</i>       |                  |                  |       |                           |
| SM-1                   | NC_015850        | 3.24             | 60.94 | (You et al., 2011)        |
| ATCC 51756             | NZ_CP005986      | 2.99             | 61.39 | (Valdes et al., 2009)     |
| <i>A. ferrivorans</i>  |                  |                  |       |                           |
| SS3                    | NC_015942        | 3.21             | 56.60 | (Liljeqvist et al., 2011) |
| CF27                   | CCCS000000000    | 3.43             | 56.40 | (Talla et al., 2014)      |



**TABLE S2** General features of bacterial strains used for comparative survey in this study.

| Strain     | Accession number | Genome status | Genome size (Mbp) | Number of CDS | Completeness (%) | Reference                |
|------------|------------------|---------------|-------------------|---------------|------------------|--------------------------|
| ZBY        | LZYI00000000     | Draft         | 3.79              | 3,713         | 99.34            | This study               |
| A01        | AZMO00000000     | Draft         | 3.82              | 3,719         | 98.72            | (Yin et al., 2014)       |
| Licanantay | JMEB00000000     | Draft         | 3.94              | 3,793         | 99.34            | (Travisany et al., 2014) |
| DMC        | LWSB00000000     | Draft         | 3.85              | 3,772         | 99.34            | (Zhang et al., 2016)     |
| A02        | LWSA00000000     | Draft         | 3.72              | 3,639         | 99.34            | (Zhang et al., 2016)     |
| GD1-3      | LWSC00000000     | Draft         | 3.95              | 3,824         | 99.34            | (Zhang et al., 2016)     |
| BY-02      | LWRZ00000000     | Draft         | 3.81              | 3,683         | 99.03            | (Zhang et al., 2016)     |
| JYC-17     | LWSD00000000     | Draft         | 3.83              | 3,737         | 99.34            | (Zhang et al., 2016)     |
| DXS-W      | LWRY00000000     | Draft         | 3.95              | 3,833         | 99.34            | (Zhang et al., 2016)     |

**TABLE S3** The distribution of the COG functional classification in the genome of *A. thiooxidans* ZBY.

| <b>COG category</b> | <b>Description</b>                                            | <b>COGs Number</b> | <b>Percent (%)</b> |
|---------------------|---------------------------------------------------------------|--------------------|--------------------|
| A                   | RNA processing and modification                               | 1                  | 0.03               |
| <b>C</b>            | <b>Energy production and conversion</b>                       | <b>177</b>         | <b>4.77</b>        |
| D                   | Cell cycle control, cell division, chromosome partitioning    | 41                 | 1.10               |
| <b>E</b>            | <b>Amino acid transport and metabolism</b>                    | <b>145</b>         | <b>3.91</b>        |
| F                   | Nucleotide transport and metabolism                           | 61                 | 1.64               |
| G                   | Carbohydrate transport and metabolism                         | 97                 | 2.61               |
| H                   | Coenzyme transport and metabolism                             | 80                 | 2.15               |
| I                   | Lipid transport and metabolism                                | 61                 | 1.64               |
| J                   | Translation, ribosomal structure, and biogenesis              | 139                | 3.74               |
| K                   | Transcription                                                 | 141                | 3.80               |
| <b>L</b>            | <b>Replication, recombination, and repair</b>                 | <b>231</b>         | <b>6.22</b>        |
| <b>M</b>            | <b>Cell wall/membrane/envelope biogenesis</b>                 | <b>207</b>         | <b>5.58</b>        |
| N                   | Cell motility                                                 | 54                 | 1.45               |
| O                   | Posttranslational modification, protein turnover, chaperones  | 118                | 3.18               |
| P                   | Inorganic ion transport and metabolism                        | 127                | 3.42               |
| Q                   | Secondary metabolites biosynthesis, transport and catabolism  | 20                 | 0.54               |
| R                   | General function prediction only                              | 196                | 5.28               |
| S                   | Function unknown                                              | 574                | 15.46              |
| T                   | Signal transduction mechanisms                                | 113                | 3.04               |
| U                   | Intracellular trafficking, secretion, and vesicular transport | 104                | 2.80               |
| V                   | Defense mechanisms                                            | 54                 | 1.45               |
|                     | No hits                                                       | 972                | 26.18              |

The four most abundant functional categories are shown in bold.

**TABLE S4** The fitting results of function  $F_c$  (A),  $F_s$  (B), and  $P_s$  (C) of *A. thiooxidans* pan-genome.

| <b>(a)</b>         |                |                |          |                            |
|--------------------|----------------|----------------|----------|----------------------------|
| $\epsilon_c$       | $\tau_c$       | $\Omega$       | R-square | Adj. R-square <sup>1</sup> |
| 2,690 ± 421***     | 2.0 ± 0.54***  | 1,994 ± 118*** | 0.9912   | 0.9883                     |
| <b>(b)</b>         |                |                |          |                            |
| $\epsilon_s$       | $\tau_s$       | $tg(\theta)$   | R-square | Adj. R-square <sup>1</sup> |
| 93,320 ± 16,520*** | 0.43 ± 0.04*** | 28 ± 3***      | 0.9996   | 0.9995                     |
| <b>(c)</b>         |                |                |          |                            |
| $\kappa$           | $\alpha$       |                | R-square | Adj. R-square <sup>1</sup> |
| 26,798 ± 7,397***  | 4.9 ± 0.4***   |                | 0.9958   | 0.9944                     |

The parameter results are in form of estimate ± standard error, and are labeled by '\*\*\*' when  $p < 0.001$ .

<sup>1</sup> Adjust R-square =  $1 - (1 - R\text{-square}) * (n - 1) / (n - k)$ , where  $n$  is the number of strains, and  $k$  is the number of parameter (here,  $k=3$ ).

**TABLE S5** Classification of core genome of *A. thiooxidans* species using the online platform KAAS.

| <b>Pathway Number</b>          | <b>Description</b>                          | <b>CDS Number</b> |
|--------------------------------|---------------------------------------------|-------------------|
| <b>Carbohydrate metabolism</b> |                                             | <b>172</b>        |
| ko00010                        | Glycolysis / Gluconeogenesis                | 26                |
| ko00020                        | Citrate cycle (TCA cycle)                   | 14                |
| ko00030                        | Pentose phosphate pathway                   | 15                |
| ko00040                        | Pentose and glucuronate interconversions    | 4                 |
| ko00051                        | Fructose and mannose metabolism             | 10                |
| ko00052                        | Galactose metabolism                        | 6                 |
| ko00053                        | Ascorbate and aldarate metabolism           | 2                 |
| ko00500                        | Starch and sucrose metabolism               | 10                |
| ko00520                        | Amino sugar and nucleotide sugar metabolism | 20                |
| ko00620                        | Pyruvate metabolism                         | 22                |
| ko00630                        | Glyoxylate and dicarboxylate metabolism     | 21                |
| ko00640                        | Propanoate metabolism                       | 8                 |
| ko00650                        | Butanoate metabolism                        | 3                 |
| ko00660                        | C5-Branched dibasic acid metabolism         | 6                 |
| ko00562                        | Inositol phosphate metabolism               | 5                 |
| <b>Energy metabolism</b>       |                                             | <b>133</b>        |
| ko00190                        | Oxidative phosphorylation                   | 50                |
| ko00195                        | Photosynthesis                              | 8                 |
| ko00710                        | Carbon fixation in photosynthetic organisms | 14                |
| ko00720                        | Carbon fixation pathways in prokaryotes     | 13                |
| ko00680                        | Methane metabolism                          | 19                |
| ko00910                        | Nitrogen metabolism                         | 8                 |
| ko00920                        | Sulfur metabolism                           | 21                |
| <b>Lipid metabolism</b>        |                                             | <b>40</b>         |
| ko00061                        | Fatty acid biosynthesis                     | 9                 |
| ko00071                        | Fatty acid degradation                      | 2                 |
| ko00100                        | Steroid biosynthesis                        | 1                 |
| ko00120                        | Primary bile acid biosynthesis              | 1                 |
| ko00121                        | Secondary bile acid biosynthesis            | 1                 |
| ko00561                        | Glycerolipid metabolism                     | 8                 |
| ko00564                        | Glycerophospholipid metabolism              | 13                |
| ko00565                        | Ether lipid metabolism                      | 2                 |
| ko00600                        | Sphingolipid metabolism                     | 1                 |
| ko00590                        | Arachidonic acid metabolism                 | 1                 |
| ko01040                        | Biosynthesis of unsaturated fatty acids     | 1                 |
| <b>Nucleotide metabolism</b>   |                                             | <b>67</b>         |
| ko00230                        | Purine metabolism                           | 41                |
| ko00240                        | Pyrimidine metabolism                       | 26                |
| <b>Amino acid metabolism</b>   |                                             | <b>142</b>        |
| ko00250                        | Alanine, aspartate and glutamate metabolism | 13                |

|                                                    |                                                     |           |
|----------------------------------------------------|-----------------------------------------------------|-----------|
| ko00260                                            | Glycine, serine and threonine metabolism            | 21        |
| ko00270                                            | Cysteine and methionine metabolism                  | 25        |
| ko00280                                            | Valine, leucine and isoleucine degradation          | 4         |
| ko00290                                            | Valine, leucine and isoleucine biosynthesis         | 10        |
| ko00300                                            | Lysine biosynthesis                                 | 10        |
| ko00220                                            | Arginine biosynthesis                               | 9         |
| ko00330                                            | Arginine and proline metabolism                     | 11        |
| ko00340                                            | Histidine metabolism                                | 10        |
| ko00350                                            | Tyrosine metabolism                                 | 4         |
| ko00360                                            | Phenylalanine metabolism                            | 4         |
| ko00380                                            | Tryptophan metabolism                               | 1         |
| ko00400                                            | Phenylalanine, tyrosine and tryptophan biosynthesis | 20        |
| <b>Metabolism of other amino acids</b>             |                                                     | <b>36</b> |
| ko00410                                            | beta-Alanine metabolism                             | 4         |
| ko00430                                            | Taurine and hypotaurine metabolism                  | 2         |
| ko00440                                            | Phosphonate and phosphinate metabolism              | 7         |
| ko00450                                            | Selenocompound metabolism                           | 3         |
| ko00460                                            | Cyanoamino acid metabolism                          | 2         |
| ko00471                                            | D-Glutamine and D-glutamate metabolism              | 2         |
| ko00473                                            | D-Alanine metabolism                                | 2         |
| ko00480                                            | Glutathione metabolism                              | 14        |
| <b>Glycan biosynthesis and metabolism</b>          |                                                     | <b>41</b> |
| ko00531                                            | Glycosaminoglycan degradation                       | 1         |
| ko00540                                            | Lipopolysaccharide biosynthesis                     | 19        |
| ko00550                                            | Peptidoglycan biosynthesis                          | 21        |
| <b>Metabolism of cofactors and vitamins</b>        |                                                     | <b>94</b> |
| ko00730                                            | Thiamine metabolism                                 | 7         |
| ko00740                                            | Riboflavin metabolism                               | 5         |
| ko00750                                            | Vitamin B6 metabolism                               | 4         |
| ko00760                                            | Nicotinate and nicotinamide metabolism              | 8         |
| ko00770                                            | Pantothenate and CoA biosynthesis                   | 13        |
| ko00780                                            | Biotin metabolism                                   | 9         |
| ko00785                                            | Lipoic acid metabolism                              | 3         |
| ko00790                                            | Folate biosynthesis                                 | 15        |
| ko00670                                            | One carbon pool by folate                           | 6         |
| ko00830                                            | Retinol metabolism                                  | 1         |
| ko00860                                            | Porphyrin and chlorophyll metabolism                | 13        |
| ko00130                                            | Ubiquinone and other terpenoid-quinone biosynthesis | 10        |
| <b>Metabolism of terpenoids and polyketides</b>    |                                                     | <b>16</b> |
| ko00900                                            | Terpenoid backbone biosynthesis                     | 8         |
| ko00909                                            | Sesquiterpenoid and triterpenoid biosynthesis       | 2         |
| ko00908                                            | Zeatin biosynthesis                                 | 1         |
| ko00523                                            | Polyketide sugar unit biosynthesis                  | 4         |
| ko01055                                            | Biosynthesis of vancomycin group antibiotics        | 1         |
| <b>Biosynthesis of other secondary metabolites</b> |                                                     | <b>28</b> |
| ko00940                                            | Phenylpropanoid biosynthesis                        | 1         |

|                                                  |                                                        |           |
|--------------------------------------------------|--------------------------------------------------------|-----------|
| ko00950                                          | Isoquinoline alkaloid biosynthesis                     | 1         |
| ko00960                                          | Tropane, piperidine and pyridine alkaloid biosynthesis | 3         |
| ko00965                                          | Betalain biosynthesis                                  | 1         |
| ko00332                                          | Carbapenem biosynthesis                                | 3         |
| ko00261                                          | Monobactam biosynthesis                                | 4         |
| ko00521                                          | Streptomycin biosynthesis                              | 8         |
| ko00524                                          | Neomycin, kanamycin and gentamicin biosynthesis        | 1         |
| ko00525                                          | Acarbose and validamycin biosynthesis                  | 2         |
| ko00401                                          | Novobiocin biosynthesis                                | 4         |
| <b>Xenobiotics biodegradation and metabolism</b> |                                                        | <b>21</b> |
| ko00627                                          | Aminobenzoate degradation                              | 2         |
| ko00364                                          | Fluorobenzoate degradation                             | 1         |
| ko00625                                          | Chloroalkane and chloroalkene degradation              | 1         |
| ko00361                                          | Chlorocyclohexane and chlorobenzene degradation        | 1         |
| ko00623                                          | Toluene degradation                                    | 1         |
| ko00633                                          | Nitrotoluene degradation                               | 2         |
| ko00643                                          | Styrene degradation                                    | 1         |
| ko00791                                          | Atrazine degradation                                   | 2         |
| ko00626                                          | Naphthalene degradation                                | 1         |
| ko00980                                          | Metabolism of xenobiotics by cytochrome P450           | 3         |
| ko00982                                          | Drug metabolism - cytochrome P450                      | 3         |
| ko00983                                          | Drug metabolism - other enzymes                        | 3         |

**TABLE S6** The predicted enzymes involved in amino sugar and nucleotide sugar metabolism in all *A. thiooxidans* genomes.

| <b>Gene</b> | <b>Description</b>                                                                                   | <b>KO Number</b> | <b>Enzyme Number</b> |
|-------------|------------------------------------------------------------------------------------------------------|------------------|----------------------|
| <i>nagZ</i> | beta-N-acetylhexosaminidase                                                                          | K01207           | 3.2.1.52             |
| <i>amgK</i> | anomeric MurNAc/GlcNAc kinase                                                                        | K07102           | 2.7.1.-              |
| <i>murU</i> | MurNAc alpha-1-phosphate uridylyltransferase                                                         | K00992           | 2.7.7.-              |
| <i>glmU</i> | bifunctional UDP-N-acetylglucosamine pyrophosphorylase / Glucosamine-1-phosphate N-acetyltransferase | K04042           | 2.7.7.23 / 2.3.1.157 |
| <i>murA</i> | UDP-N-acetylglucosamine 1-carboxyvinyltransferase                                                    | K00790           | 2.5.1.7              |
| <i>murB</i> | UDP-N-acetylmuramate dehydrogenase                                                                   | K00075           | 1.3.1.98             |
| <i>glmM</i> | phosphoglucosamine mutase                                                                            | K03431           | 5.4.2.10             |
| <i>scrK</i> | fructokinase                                                                                         | K00847           | 2.7.1.4              |
| <i>glk</i>  | glucokinase                                                                                          | K00845           | 2.7.1.2              |
| <i>pgm</i>  | phosphoglucomutase                                                                                   | K01835           | 5.4.2.2              |
| <i>galU</i> | UTP--glucose-1-phosphate uridylyltransferase                                                         | K00963           | 2.7.7.9              |
| <i>ugd</i>  | UDPglucose 6-dehydrogenase                                                                           | K00012           | 1.1.1.22             |
| <i>galE</i> | UDP-glucose 4-epimerase                                                                              | K01784           | 5.1.3.2              |
|             | UDP-glucuronate 4-epimerase                                                                          | K08679           | 5.1.3.6              |
| <i>manB</i> | phosphomannomutase                                                                                   | K01840           | 5.4.2.8              |
| <i>rfbA</i> | mannose-1-phosphate guanylyltransferase / mannose-6-phosphate isomerase                              | K16011           | 2.7.7.13 / 5.3.1.8   |
| <i>gmd</i>  | GDPmannose 4,6-dehydratase                                                                           | K01711           | 4.2.1.47             |
| <i>rmd</i>  | GDP-4-dehydro-6-deoxy-D-mannose reductase                                                            | K15856           | 1.1.1.281            |
| <i>rfbI</i> | CDP-4-dehydro-6-deoxyglucose reductase, E3                                                           | K00523           | 1.17.1.1             |
| <i>glgC</i> | glucose-1-phosphate adenylyltransferase                                                              | K00975           | 2.7.7.27             |

**TABLE S7** Genes involved in sulfur oxidation and electron transfer in core genome of *A. thiooxidans* species.

| <b>Gene</b>                                | <b>Description</b>                                | <b>KO Number</b> | <b>Enzyme Number</b> |
|--------------------------------------------|---------------------------------------------------|------------------|----------------------|
| <i>sqr</i>                                 | sulfide quinone oxidoreductase                    | K17218           | 1.8.5.4              |
| Tetrathionate hydrolase operon             |                                                   |                  |                      |
| <i>tetH</i>                                | tetrathionate hydrolase                           |                  |                      |
| <i>doxD</i>                                | thiosulfate:quinone oxidoreductase subunit DoxD   | K16936           | 1.8.5.2              |
| Sulfur-oxidizing protein                   |                                                   |                  |                      |
| <i>soxA</i>                                | sulfur-oxidizing protein SoxA                     | K17222           |                      |
| <i>soxX</i>                                | sulfur-oxidizing protein SoxX                     | K17223           |                      |
| <i>soxY</i>                                | sulfur-oxidizing protein SoxY                     | K17226           |                      |
| <i>soxZ</i>                                | sulfur-oxidizing protein SoxZ                     | K17227           |                      |
| <i>soxB</i>                                | sulfur-oxidizing protein SoxB                     | K17224           |                      |
| Heterodisulfide reductase                  |                                                   |                  |                      |
| <i>hdrA</i>                                | heterodisulfide reductase subunit A               |                  |                      |
| <i>hdrB</i>                                | heterodisulfide reductase subunit B               |                  |                      |
| <i>hdrC</i>                                | heterodisulfide reductase subunit C               |                  |                      |
| <i>tst</i>                                 | thiosulfate sulfurtransferase                     |                  | 2.8.1.1              |
| <i>sat</i>                                 | sulfate adenylyltransferase                       |                  | 2.7.7.4              |
| <i>bd</i> ubiquinol oxidases               |                                                   |                  | 1.10.3.14            |
| <i>cydA</i>                                | cytochrome <i>d</i> ubiquinol oxidase subunit I   | K00425           |                      |
| <i>cydB</i>                                | cytochrome <i>d</i> ubiquinol oxidase subunit II  | K00426           |                      |
| <i>bo<sub>3</sub></i> ubiquinol oxidases   |                                                   |                  | 1.10.3.10            |
| <i>cyoA</i>                                | cytochrome <i>o</i> ubiquinol oxidase, subunit II | K02297           |                      |
| <i>cyoB</i>                                | cytochrome <i>o</i> ubiquinol oxidase subunit I   | K02298           |                      |
| <i>cyoC</i>                                | cytochrome <i>o</i> ubiquinol oxidase subunit III | K02299           |                      |
| <i>cyoD</i>                                | cytochrome <i>o</i> ubiquinol oxidase subunit IV  | K02300           |                      |
| NADH-ubiquinone oxidoreductase (complex I) |                                                   |                  | 1.6.5.3              |
| <i>nuoA</i>                                | NADH-ubiquinone oxidoreductase, A subunit         | K00330           |                      |
| <i>nuoB</i>                                | NADH-ubiquinone oxidoreductase, B subunit         | K00331           |                      |
| <i>nuoC</i>                                | NADH-ubiquinone oxidoreductase, C subunit         | K00332           |                      |
| <i>nuoD</i>                                | NADH-ubiquinone oxidoreductase, D subunit         | K00333           |                      |
| <i>nuoE</i>                                | NADH-ubiquinone oxidoreductase, E subunit         | K00334           |                      |
| <i>nuoF</i>                                | NADH-ubiquinone oxidoreductase, F subunit         | K00335           |                      |
| <i>nuoG</i>                                | NADH-ubiquinone oxidoreductase, G subunit         | K00336           |                      |
| <i>nuoH</i>                                | NADH-ubiquinone oxidoreductase, H subunit         | K00337           |                      |
| <i>nuoI</i>                                | NADH-ubiquinone oxidoreductase, I subunit         | K00338           |                      |
| <i>nuoJ</i>                                | NADH-ubiquinone oxidoreductase, J subunit         | K00339           |                      |
| <i>nuoK</i>                                | NADH-ubiquinone oxidoreductase, K subunit         | K00340           |                      |
| <i>nuoL</i>                                | NADH-ubiquinone oxidoreductase, L subunit         | K00341           |                      |
| <i>nuoM</i>                                | NADH-ubiquinone oxidoreductase, M subunit         | K00342           |                      |
| <i>nuoN</i>                                | NADH-ubiquinone oxidoreductase, N subunit         | K00343           |                      |



## SUPPLEMENTARY REFERENCES

- Liljeqvist, M., Valdes, J., Holmes, D. S., and Dopson, M. (2011). Draft genome of the psychrotolerant acidophile *Acidithiobacillus ferrivorans* SS3. *J Bacteriol* 193, 4304-4305.
- Talla, E., Hedrich, S., Mangenot, S., Ji, B., Johnson, D. B., Barbe, V. et al. (2014). Insights into the pathways of iron-and sulfur-oxidation, and biofilm formation from the chemolithotrophic acidophile *Acidithiobacillus ferrivorans* CF27. *Res Microbiol* 165, 753-760.
- Travisany, D., Cortés, M. P., Latorre, M., Di Genova, A., Budinich, M., Bobadilla-Fazzini, R. A. et al. (2014). A new genome of *Acidithiobacillus thiooxidans* provides insights into adaptation to a bioleaching environment. *Res Microbiol* 165, 743-752.
- Valdes, J., Ossandon, F., Quatrini, R., Dopson, M., and Holmes, D. S. (2011). Draft genome sequence of the extremely acidophilic biomining bacterium *Acidithiobacillus thiooxidans* ATCC 19377 provides insights into the evolution of the *Acidithiobacillus* genus. *J Bacteriol* 193, 7003-7004.
- Valdés, J., Pedroso, I., Quatrini, R., Dodson, R. J., Tettelin, H., Blake, R. et al. (2008). *Acidithiobacillus ferrooxidans* metabolism: from genome sequence to industrial applications. *BMC Genomics* 9, 597.
- Valdes, J., Quatrini, R., Hallberg, K., Dopson, M., Valenzuela, P. D. T., Holmes, D. S. (2009). Draft genome sequence of the extremely acidophilic bacterium *Acidithiobacillus caldus* ATCC 51756 reveals metabolic versatility in the genus *Acidithiobacillus*. *J Bacteriol* 191, 5877-5878.
- Yin, H., Zhang, X., Liang, Y., Xiao, Y., Niu, J., Liu, X. (2014). Draft genome sequence of the extremophile *Acidithiobacillus thiooxidans* A01, isolated from the wastewater of a coal dump. *Genome Announc* 2, e00222-14.
- You, X. Y., Guo, X., Zheng, H. J., Zhang, M. J., Liu, L. J., Zhu, Y. Q. et al. (2011). Unraveling the *Acidithiobacillus caldus* complete genome and its central metabolisms for carbon assimilation. *J Genet Genomics* 38, 243-252.
- Zhang, X., Feng, X., Tao, J., Ma, L., Xiao, Y., Liang, Y. et al. (2016a). Comparative genomics of the extreme acidophile *Acidithiobacillus thiooxidans* reveals intraspecific divergence and niche adaptation. *Int J Mol Sci* 17, 1355.
